# Supplementary material for: Effect of Catalyst Crystallinity on V-Based Selective Catalytic Reduction with Ammonia
Source: MDPI journal article supplement (doi:10.3390/nano11061452), 2021-05-30
Supplement: s1 [file s1]

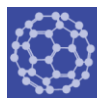

Supporting information

# Effect of Catalyst Crystallinity on V-Based Selective Catalytic Reduction with Ammonia

Min Seong Lee <sup>1,2,†</sup>, Sun-I Kim <sup>1,†</sup>, Myeung-jin Lee <sup>1</sup>, Bora Ye <sup>1</sup>, Taehyo Kim <sup>1</sup>, Hong-Dae Kim <sup>1</sup>, Jung Woo Lee <sup>2,\*</sup> and Duck Hyun Lee <sup>1,\*</sup>

<sup>1</sup> Green Materials and Processes R&D Group, Korea Institute of Industrial Technology, Ulsan 44413, Republic of Korea; qneh5@kitech.re.kr (M.S.L.); sunikim@kitech.re.kr (S.-I.K.); leemj@kitech.re.kr (M.-j.L.); yebora@kitech.re.kr (B.Y.); thkim0215@kitech.re.kr (T.K.); hdkim@kitech.re.kr (H.-D.K.)

<sup>2</sup> Department of Materials Science & Engineering, Pusan National University, Busan 46241, Republic of Korea

\* Correspondence: jungwoolee@pusan.ac.kr (J.W.L.); Tel.: +82-51-510-2898 (J.W.L.); dulee@kitech.re.kr (D.H.L.); Tel.: +82-52-980-6709 (D.H.L.); Fax: +82-52-980-6669 (D.H.L.)

† These authors contributed equally to this study and should be considered as co-first authors.

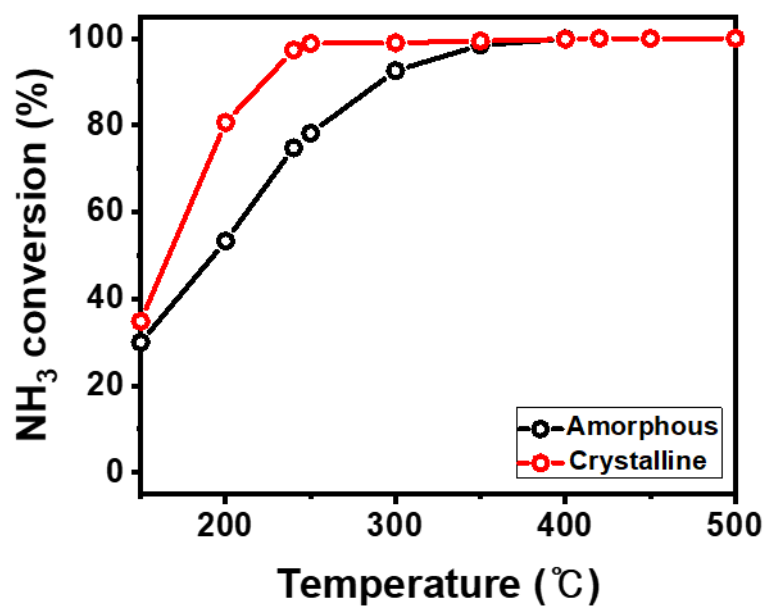

**Figure S1.** NH<sub>3</sub> conversion of amorphous and crystalline V<sub>2</sub>O<sub>5</sub>-WO<sub>3</sub>/TiO<sub>2</sub> catalyst, which was calculated with equation 3.

NH<sub>3</sub> conversion was calculated with equation 3.

$$\text{NH}_3 \text{ conversion (\%)} = \frac{\text{NH}_3 \text{ inlet} - \text{NH}_3 \text{ outlet}}{\text{NH}_3 \text{ inlet}} \times 100 \quad (3)$$

NH<sub>3</sub> conversion of crystalline V<sub>2</sub>O<sub>5</sub>-WO<sub>3</sub>/TiO<sub>2</sub> catalyst is higher than amorphous V<sub>2</sub>O<sub>5</sub>-WO<sub>3</sub>/TiO<sub>2</sub> catalyst at temperature range 150–350 °C, and both catalysts maintain NH<sub>3</sub> conversion rate of 100 above 350 °C. Also, NH<sub>3</sub> conversion value is very similar to the NO<sub>x</sub> conversion rate.

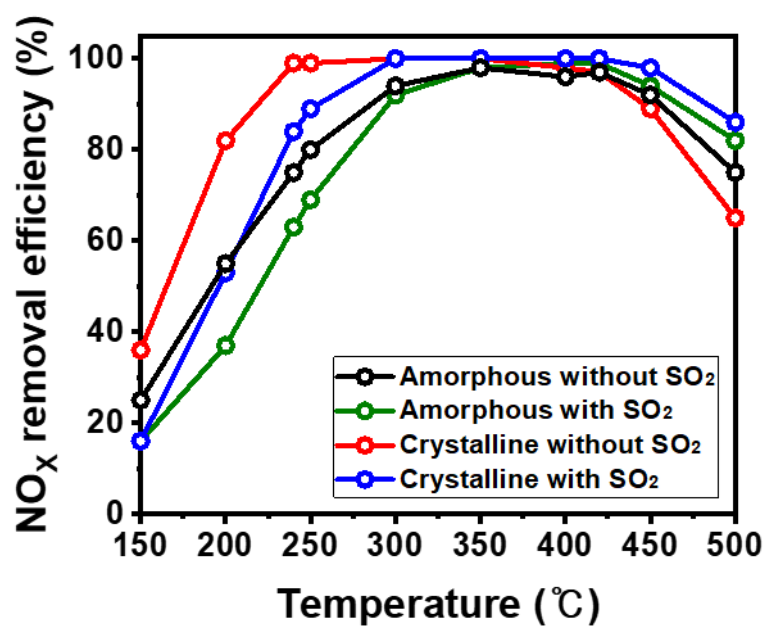

**Figure S2.** NO<sub>x</sub> removal efficiency of Amorphous and Crystalline V<sub>2</sub>O<sub>5</sub>-WO<sub>3</sub>/TiO<sub>2</sub> catalyst. Reaction conditions: [NO] & [NH<sub>3</sub>] = 300 ppm, [SO<sub>2</sub>] = 0 or 300 ppm, [O<sub>2</sub>] = 5 vol.%, [GHSV] = 60,000 h<sup>-1</sup>.

We compared the NO<sub>x</sub> removal efficiency of amorphous and crystalline V<sub>2</sub>O<sub>5</sub>-WO<sub>3</sub>/TiO<sub>2</sub> catalyst in the gas condition containing SO<sub>2</sub>. From the result, NO<sub>x</sub> removal efficiency of crystalline V<sub>2</sub>O<sub>5</sub>-WO<sub>3</sub>/TiO<sub>2</sub> catalyst is higher than amorphous V<sub>2</sub>O<sub>5</sub>-WO<sub>3</sub>/TiO<sub>2</sub> catalyst, which means that crystalline V<sub>2</sub>O<sub>5</sub>-WO<sub>3</sub>/TiO<sub>2</sub> catalyst is good to SCR reaction regardless of SO<sub>2</sub>.
